# Supplementary material for: Another One Bites the Net: Assessing the Economic Impacts of Lagocephalus sceleratus on Small-Scale Fisheries in Greece
Source: MDPI journal article supplement (doi:10.3390/fishes9030104), 2024-03-07
Supplement: s1 [file s1]

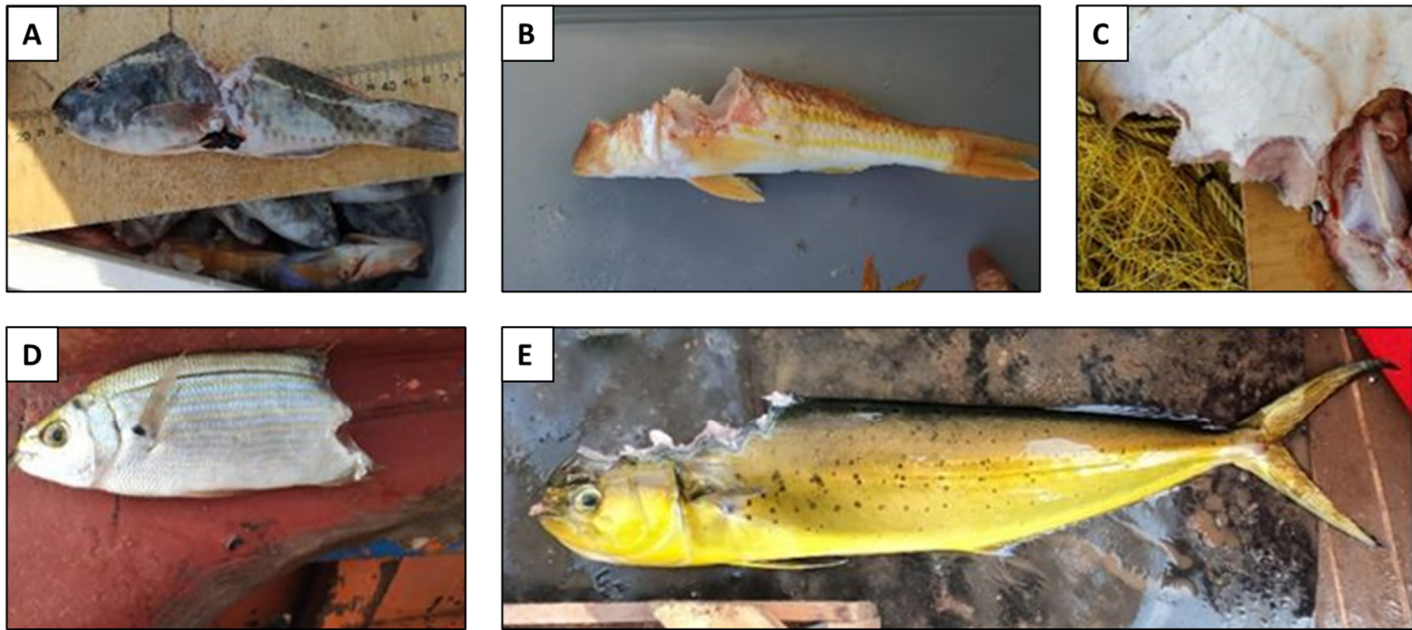

**Figure S1.** Typical triangular-shaped bite mark of *L. scleratus* on some commercial catches, recorded during small-scale fishing trips conducted in seas around Crete during the period May 2020–December 2022: A) Mediterranean parrotfish, *Sparisoma cretense*. B) Striped red mullet, *Mullus surmuletus*. C) Common stingray, *Dasyatis pastinaca*. D) Salema, *Sarpa salpa*. E) Common dolphinfish, *Coryphaena hippurus*.

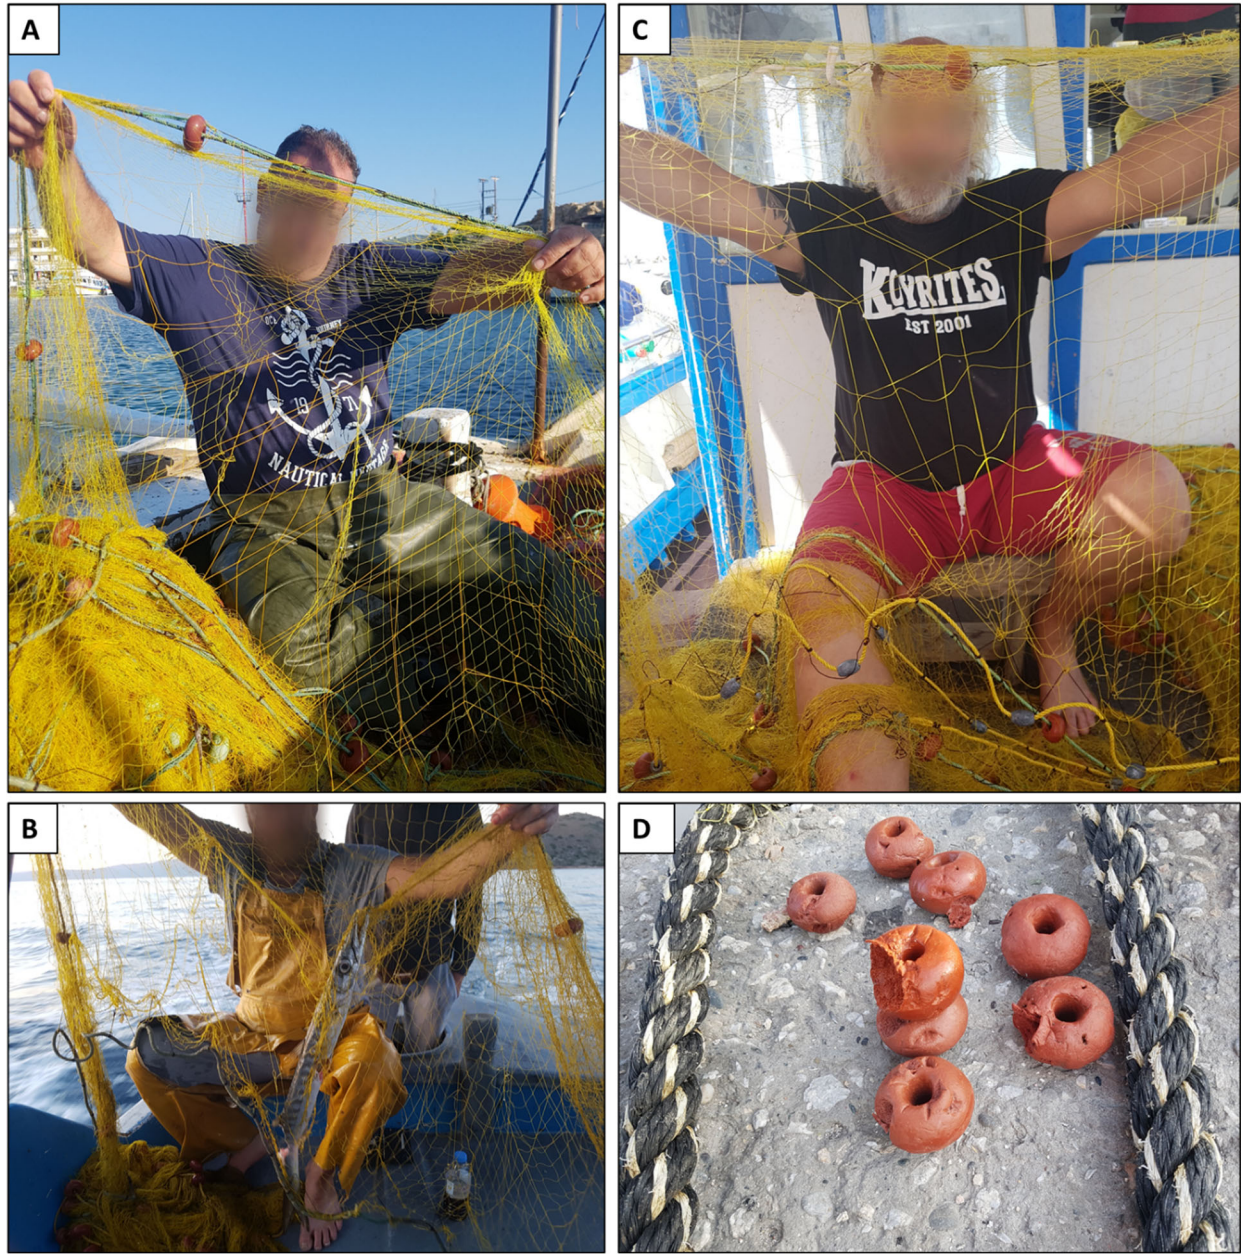

**Figure S2.** Damages of *L. scleratus* in small-scale fishing trips conducted in seas around Crete during the period May 2020–December 2022: A) Cluster of holes in trammel net. B) Cluster of holes in trammel net, around a depredated European barracuda *Sphyraena sphyraena*, with obvious triangular-shaped bite marks. C) Single big hole in trammel net with the outer net layers being intact. D) Damages on sturdy gear parts (net floaters).

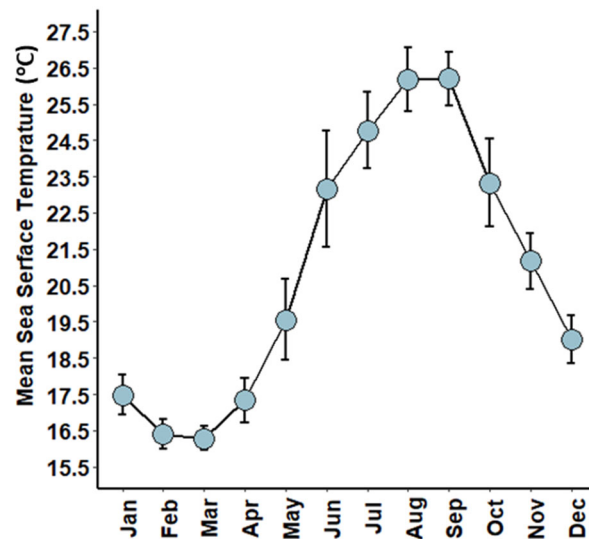

**Figure S3.** Mean sea surface temperature per month in coastal waters of Crete. Error bars represent standard errors. Temperature data were acquired on a year-round basis through deployments of a temperature logger (HOBO Pendant Temperature/Light 64K Data Logger UA-002-64).

**Table S1.** Annual economic losses (mean  $\pm$  S.D.) inflicted by *L. sceleratus* on small-scale fisheries operating in various Mediterranean regions per loss category, vessel and gear.

| Region                                 | Gear             | Economic Losses         |                         |                         | Reference         |
|----------------------------------------|------------------|-------------------------|-------------------------|-------------------------|-------------------|
|                                        |                  | Gear Loss               | Labor Loss              | Catch Loss              |                   |
| Southeast Aegean Sea and Levantine Sea | Longline         | TL 942.4 $\pm$ 1007.7   | TL 67.9 $\pm$ 215.5     | NE                      | [39]              |
|                                        | Net              | TL 1346.9 $\pm$ 1451.0  | NE                      | NE                      |                   |
|                                        | Longline and Net | TL 1440.6 $\pm$ 900.7   | NE                      | NE                      |                   |
| Southeast Aegean Sea and Levantine Sea | Longline         | TL 2336.1 $\pm$ 2087.9  | TL 64.7 $\pm$ 90.1      | NE                      | [40]              |
|                                        | Net              | TL 2820.6 $\pm$ 3393.4  | NE                      | NE                      |                   |
|                                        | Longline and Net | TL 2559.6 $\pm$ 2781.0  | NE                      | NE                      |                   |
| Southeast Aegean Sea and Levantine Sea | Longline         | TL 2929.4 $\pm$ 2023.0  | NE                      | TL 2460.0 $\pm$ 1742.3  | [18] <sup>1</sup> |
|                                        | Net              | TL 3352.9 $\pm$ 4311.8  | NE                      | TL 3410.0 $\pm$ 4431.1  |                   |
|                                        | Longline and Net | TL 3070.6 $\pm$ 2949.4  | NE                      | TL 2776.7 $\pm$ 2907.5  |                   |
| Libyan Sea                             | Longline         | EUR 650.0 $\pm$ 919.2   | EUR 1960.0 $\pm$ 2771.9 | EUR 720.0 $\pm$ 1018.2  | Present study     |
|                                        | Net              | EUR 1364.3 $\pm$ 551.9  | EUR 1662.2 $\pm$ 2652.5 | EUR 2262.9 $\pm$ 762.7  |                   |
|                                        | Longline and Net | EUR 2494.8 $\pm$ 1304.6 | EUR 5348.4 $\pm$ 3371.9 | EUR 2648.5 $\pm$ 828.5  |                   |
| Cretan Sea                             | Longline         | EUR 628.3 $\pm$ 491.5   | EUR 1255.0 $\pm$ 2362.9 | EUR 444.0 $\pm$ 282.2   | Present study     |
|                                        | Net              | EUR 1550.0 $\pm$ 1324.9 | EUR 1905.9 $\pm$ 2571.1 | EUR 1360.4 $\pm$ 1449.4 |                   |
|                                        | Longline and Net | EUR 1459.3 $\pm$ 979.6  | EUR 1904.1 $\pm$ 2388.7 | EUR 1755.5 $\pm$ 1519.2 |                   |
| Ionian Sea                             | Longline         | EUR 40.0 $\pm$ 54.8     | EUR 672.0 $\pm$ 920.2   | -                       | Present study     |
|                                        | Net              | EUR 7.9 $\pm$ 48.7      | -                       | -                       |                   |
|                                        | Longline and Net | EUR 363.6 $\pm$ 1206.0  | EUR 553.6 $\pm$ 1374.7  | -                       |                   |

TL, Turkish lira (TL 1 $\sim$  EUR 0.34, 2011-2012; TL 1 $\sim$  EUR 0.37, 2013-2014; TL 1 $\sim$  EUR 0.09, 2020-2022).

NE=not estimated.

<sup>1</sup>Losses inflicted by various pufferfish species.

**Table S2.** Annual gear and catch economic losses inflicted by marine mammals and *L. sceleratus* on small-scale fisheries operating in various Greek regions. NA = not available.

| Region                                | Gear                                | Species involved               | Range         | Mean $\pm$ standard deviation | Sampling method (sample size)    | Reference     |
|---------------------------------------|-------------------------------------|--------------------------------|---------------|-------------------------------|----------------------------------|---------------|
| North Aegean Sea (Thermaikos Gulf)    | Gillnets                            | <i>Tursiops truncatus</i>      | NA            | EUR >5000                     | Interviews (60) + On boards (74) | [52]          |
| Ionian Sea (Ambracia Gulf)            | Gillnets + Trammel nets             | <i>Tursiops truncatus</i>      | EUR 500-5000  | NA                            | Interviews (50)                  | [50]          |
| Ionian Sea (Inner Ionian Archipelago) | Gillnets + Trammel nets             | <i>Tursiops truncatus</i>      | EUR 500-20000 | NA                            | Interviews (50)                  | [50]          |
| Central Greece (North Corinth Gulf)   | Bottom set nets                     | <i>Tursiops truncatus</i>      | EUR 0-10000   | EUR 1398 $\pm$ 1950           | Interviews (NA)                  | [51]          |
| Central Greece (South Corinth Gulf)   | Bottom set nets                     | <i>Tursiops truncatus</i>      | EUR 0-1000    | EUR 81 $\pm$ 254              | Interviews (NA)                  | [51]          |
| Southeast Aegean Sea (Lipsi Island)   | Gillnets + Trammel nets             | <i>Monachus monachus</i>       | NA            | EUR 2230                      | Port sampling (371)              | [53]          |
| Ionian Sea                            | Gillnets + Trammel nets + Longlines | <i>Lagocephalus sceleratus</i> | EUR 0-4000    | EUR 83 $\pm$ 545              | Interviews (54)                  | Present study |
| Cretan Sea                            | Gillnets + Trammel nets + Longlines | <i>Lagocephalus sceleratus</i> | EUR 0-9760    | EUR 2870 $\pm$ 2184           | Interviews (54)                  | Present study |
| Libyan Sea                            | Gillnets + Trammel nets + Longlines | <i>Lagocephalus sceleratus</i> | EUR 0-8840    | EUR 4593 $\pm$ 2013           | Interviews (33)                  | Present study |

## References

18. Öndes, F.; Ünal, V.; Özbilgin, Y.; Deval, C.; Turan, C. By-catch and monetary loss of pufferfish in Turkey, the Eastern Mediterranean. *Ege J. Fish. Aquat. Sci.* **2018**, *35*, 361–372. <https://doi.org/10.12714/egejfas.2018.35.4.01>.
39. Ünal, V.; Göncüoğlu, H.; Durgun, D.; Tosunoğlu, Z.; Deval, C.; Turan, C. Silver-cheeked toadfish, *Lagocephalus sceleratus* (Actinopterygii: Tetraodontiformes: Tetraodontidae), causes a substantial economic losses in the Turkish Mediterranean coast: A call for decision makers. *Acta Ichthyol. Pisc.* **2015**, *45*, 231–237. <https://doi.org/10.3750/AIP2015.45.3.02>.
40. Ünal, V.; Bodur, H.G. The socio-economic impacts of the silver-cheeked toadfish on small-scale fishers: A comparative study from the Turkish coast. *J. Fish. Aquat. Sci.* **2017**, *34*, 119–127.
50. Gonzalvo, J.; Giovos, I.; Moutopoulos, D.K. Fishermen's perception on the sustainability of small-scale fisheries and dolphin–fisheries interactions in two increasingly fragile coastal ecosystems in western Greece. *Aquat. Conserv. Mar. Freshw. Ecosyst.* **2015**, *25*, 91–106. <https://doi.org/10.1002/aqc.2444>.
51. Bonizzoni, S.; Bearzi, G.; Santostasi, N.L.; Furey, N.B.; Valavanis, V.D.; Würsig, B. Dolphin depredation of bottom-set fishing nets in the Gulf of Corinth, Mediterranean Sea. In Proceedings of the 30th Annual Conference of the European Cetacean Society, Madeira, Portugal, 14–16 March 2016.
52. Garagouni, M.; Avgerinou, G.; Mouchlianitis, F.A.; Minos, G.; Ganas, K. Questionnaire and experimental surveys show that dolphins cause substantial losses to a gillnet fishery in the eastern Mediterranean Sea. *ICES J. Mar. Sci.* **2022**, *79*, 2552–2561. <https://doi.org/10.1093/icesjms/fsac196>.
53. Ríos, N.; Drakulic, M.; Paradinas, I.; Millioui, A.; Cox, R. Occurrence and impact of interactions between small-scale fisheries and predators, with focus on Mediterranean monk seals (*Monachus monachus* Hermann 1779), around Lipsi Island complex, Aegean Sea, Greece. *Fish. Res.* **2017**, *187*, 1–10. <https://doi.org/10.1016/j.fishres.2016.10.013>.
